# Supplementary material for: Synthesis and Fundamental Evaluation of Radioiodinated Rociletinib (CO-1686) as a Probe to Lung Cancer with L858R/T790M Mutations of Epidermal Growth Factor Receptor (EGFR)
Source: PubMed Central journal article supplement (PMC7356761; doi:10.3390/molecules25122914), 2020-06-24
Supplement: molecules-25-02914-s001.pdf [file molecules-25-02914-s001.pdf]

## Supporting Information

### **Synthesis and fundamental evaluation of radioiodinated rociletinib (CO-1686) as a probe to lung cancer with L858R/T790M mutations of epidermal growth factor receptor (EGFR)**

*Muammar Fawwaz<sup>1,2</sup>, Kenji Mishiro<sup>3</sup>, Ryuichi Nishii<sup>4</sup>, Izumi Sawazaki<sup>1</sup>, Kazuhiro Shiba<sup>5</sup>, Seigo Kinuya<sup>1</sup> and Kazuma Ogawa<sup>\*1,3</sup>*

<sup>1</sup> Graduate School of Medical Sciences, Kanazawa University, Kakuma-machi, Kanazawa, Ishikawa 920-1192, Japan.

<sup>2</sup> Faculty of Pharmacy, Universitas Muslim Indonesia, Urip Sumoharjo KM. 10, Makassar 90-231, Indonesia.

<sup>3</sup> Institute for Frontier Science Initiative, Kanazawa University, Kakuma-machi, Kanazawa, Ishikawa 920-1192, Japan.

<sup>4</sup> National Institute of Radiological Sciences (NIRST), QST, Inage-ku, Chiba 263-8555, Japan.

<sup>5</sup> Advanced Science Research Center, Kanazawa University, Takara-machi, Kanazawa, Ishikawa 920-8640, Japan.

#### **\*Corresponding Author**

Institute for Frontier Science Initiative; Kanazawa University; Kakuma- machi, Kanazawa 920-1192; Japan.

Telephone: 81-76-234-4460; Fax: 81-76-234-4459

E-mail: kogawa@p.kanazawa-u.ac.jp

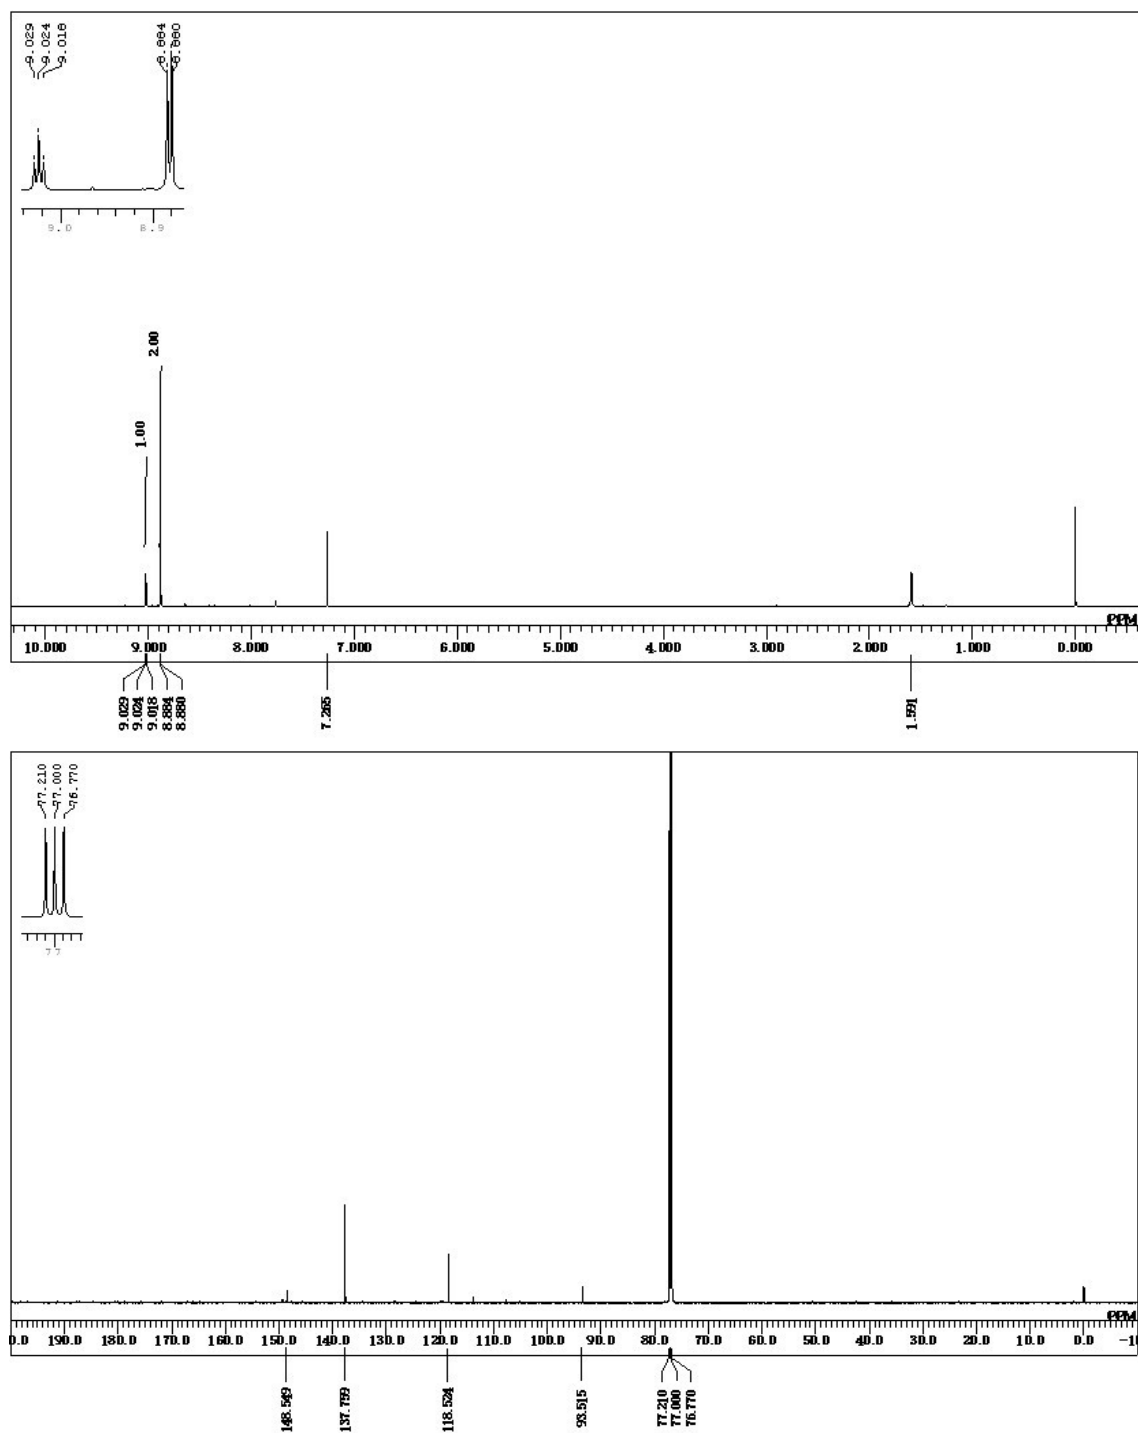

**Figure S1.** The proton and carbon NMR peak of 1-iodo-3,5-dinitrobenzene (1).  $^1\text{H}$  NMR (400 MHz,  $\text{CDCl}_3$ ):  $\delta$  8.88 (2H, d,  $J = 1.6$  Hz), 9.02 (1H, t,  $J = 2.0$  Hz).  $^{13}\text{C}$  NMR (100 MHz,  $\text{CDCl}_3$ ):  $\delta$  93.5, 118.5, 137.8, 148.5. HRMS (FAB+) calculated for  $\text{C}_6\text{H}_3\text{IN}_2\text{O}_4$   $[\text{M} + \text{H}]^+$ :  $m/z = 294.9216$ , found 294.9225.

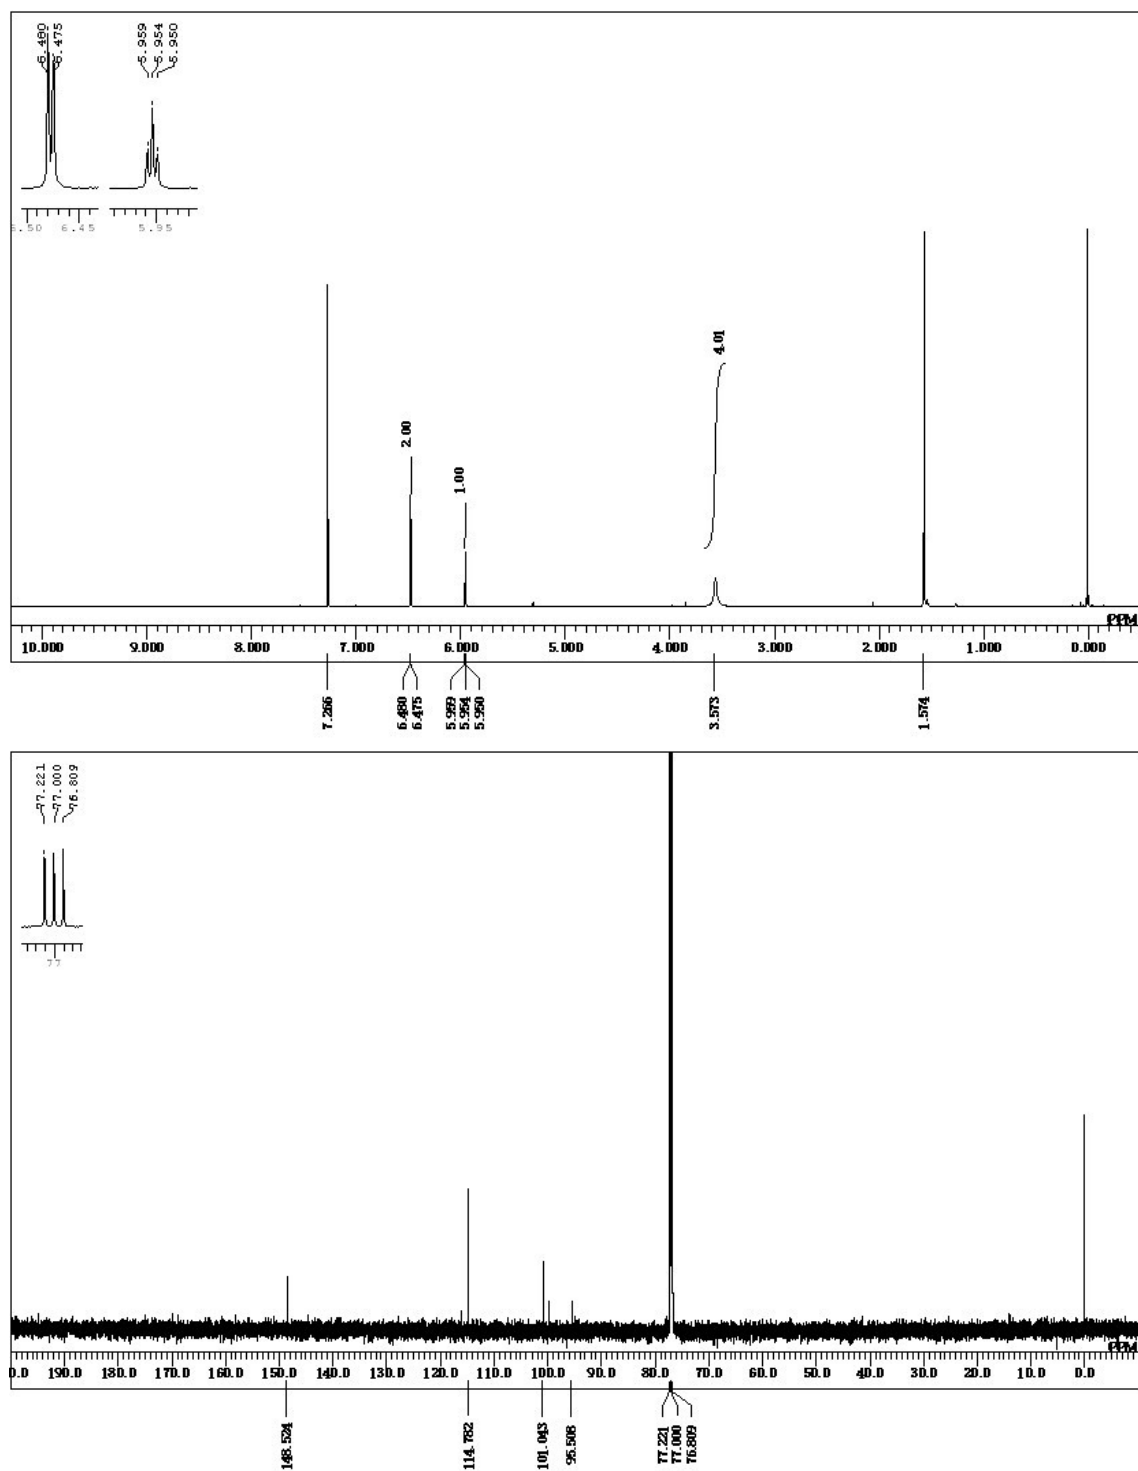

**Figure S2.** The proton and carbon NMR peak of 5-iodobenzene-1,3-diamine (**2**).  $^1\text{H}$  NMR (400 MHz,  $\text{CDCl}_3$ ):  $\delta$  3.57 (4H, s), 5.95 (1H, t,  $J = 2.0$  Hz), 6.48 (2H, d,  $J = 2.0$  Hz).  $^{13}\text{C}$  NMR (100 MHz,  $\text{CDCl}_3$ ):  $\delta$  95.5, 101.0, 114.8, 148.5. HRMS (FAB+) calculated for  $\text{C}_6\text{H}_7\text{IN}_2$   $[\text{M} + \text{H}]^+$ :  $m/z = 233.9654$ , found 233.9645.

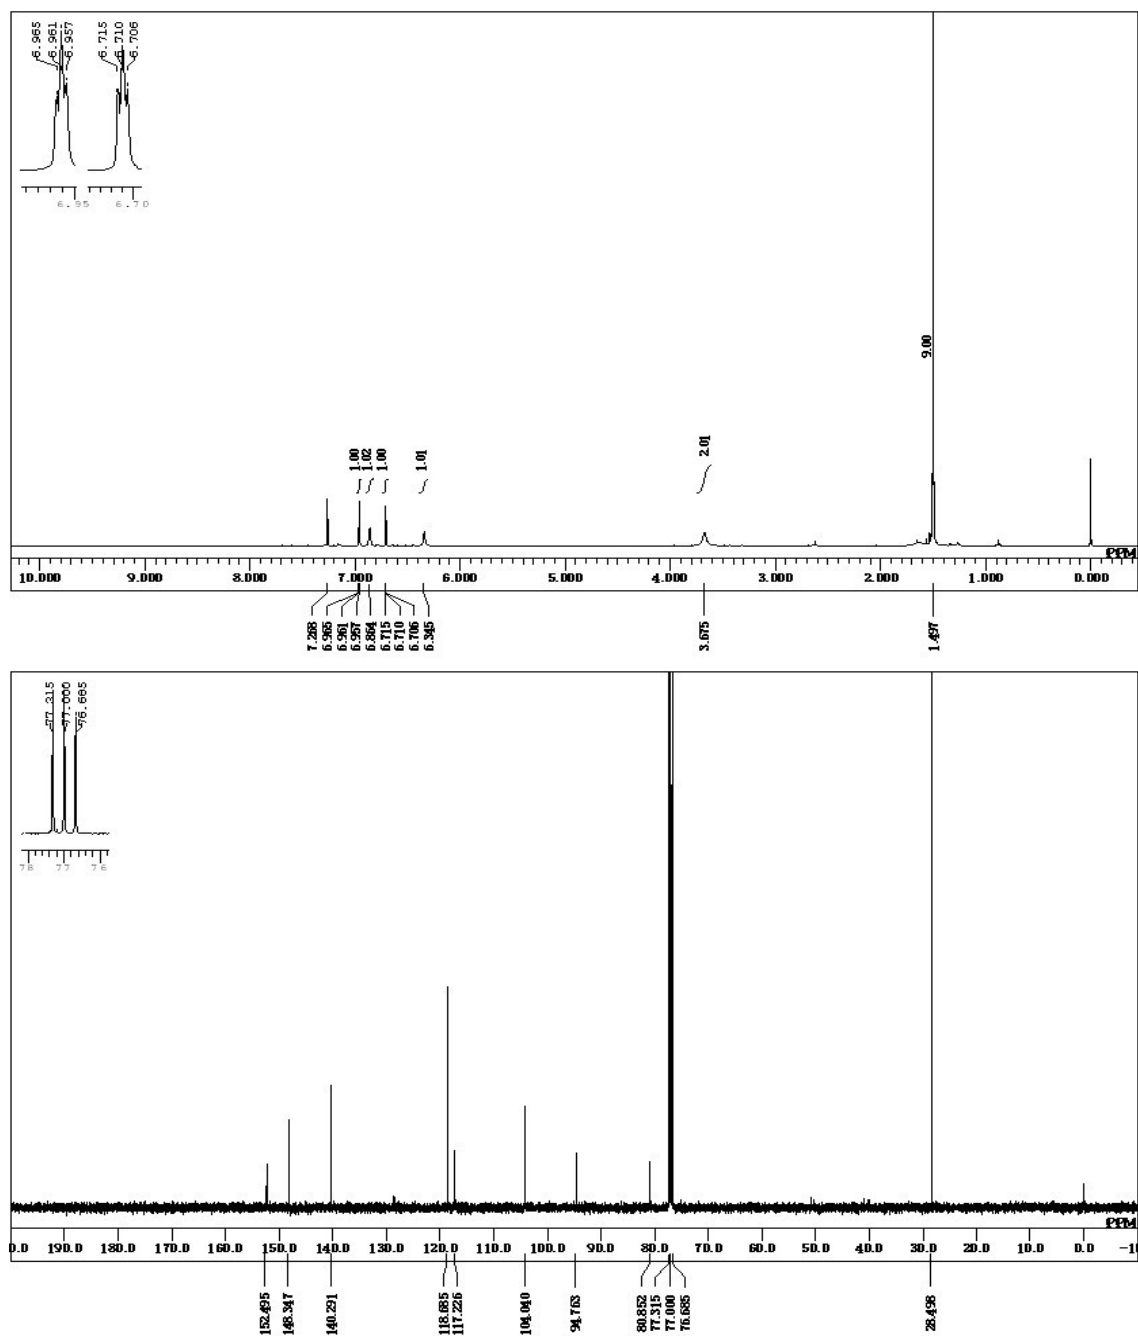

**Figure S3.** The proton and carbon NMR peak of tert-butyl (3-amino-5-iodophenyl)carbamate (**3**). <sup>1</sup>H NMR (400 MHz, CDCl<sub>3</sub>): δ 1.50 (9H, s), 3.68 (2H, s), 6.34 (1H, s), 6.71 (1H, t, *J* = 1.6 Hz), 6.86 (1H, s), 6.96 (1H, t, *J* = 1.6 Hz). <sup>13</sup>C NMR (100 MHz, CDCl<sub>3</sub>): δ 28.5 (3C), 80.9, 94.8, 104.0, 117.2, 118.7, 140.3, 148.3, 152.5. HRMS (FAB+) calculated for C<sub>11</sub>H<sub>15</sub>IN<sub>2</sub>O<sub>2</sub> [M+ H]<sup>+</sup>: *m/z* = 334.0178, found 334.0168.

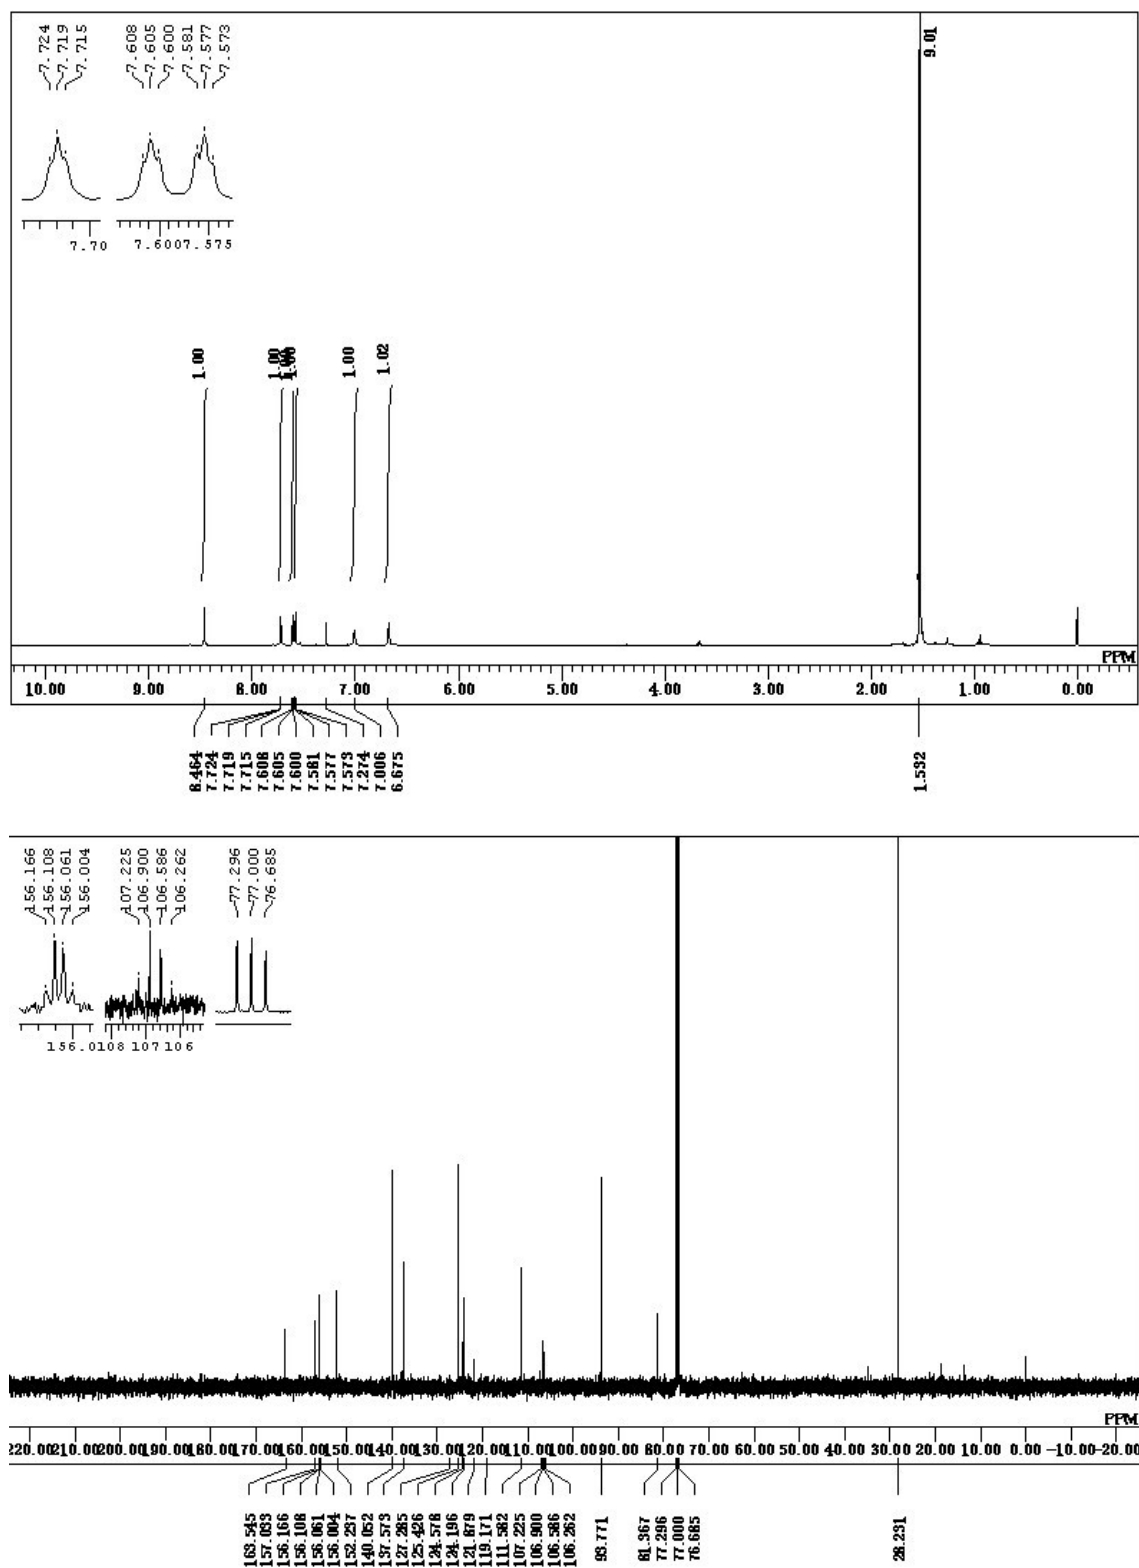

**Figure S4.** The proton and carbon NMR peak of tert-butyl (3-((2-chloro-5-(trifluoromethyl)pyrimidin-4-yl)amino)-5-iodophenyl)carbamate (**4**). <sup>1</sup>H NMR (400 MHz,

CDCl<sub>3</sub>): δ 1.53 (9H, s), 6.68 (1H, s), 7.00 (1H, s), 7.58 (1H, t, *J* = 1.6 Hz), 7.61 (1H, t, *J* = 1.6 Hz), 7.72 (1H, t, *J* = 1.6 Hz), 8.46 (1H, s). <sup>13</sup>C NMR (100 MHz, CDCl<sub>3</sub>): δ 28.2 (3C), 81.4, 93.8, 106.7 (q, *J*<sub>CF</sub> = 31.4 Hz), 111.6, 123.0 (q, *J*<sub>CF</sub> = 270 Hz), 124.2, 125.4, 137.6, 140.1, 152.2, 156.1 (q, *J*<sub>CF</sub> = 4.7 Hz), 157.0, 163.5. HRMS (FAB+) calculated for C<sub>16</sub>H<sub>15</sub>ClF<sub>3</sub>IN<sub>4</sub>O<sub>2</sub> [M+ H]<sup>+</sup>: *m/z* = 513.9880, found 513.9875.

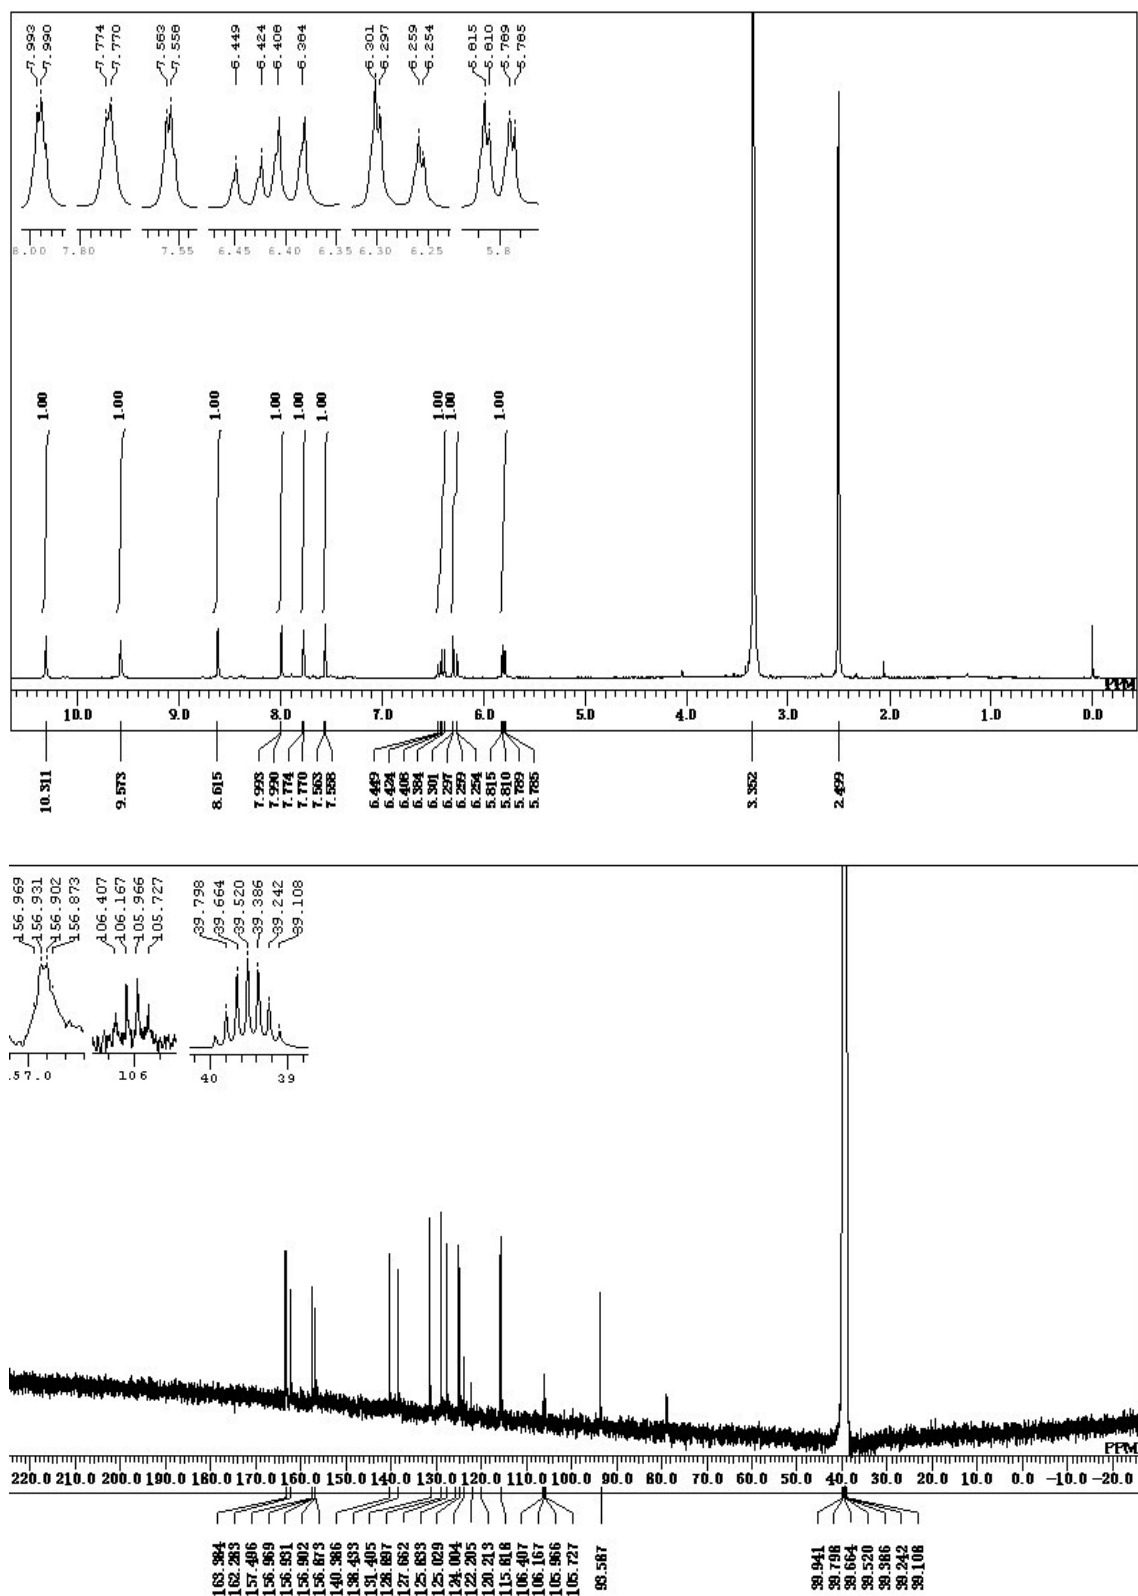

**Figure S5.** The proton and carbon NMR peak of N-(3-((2-chloro-5-(trifluoromethyl)pyrimidin-4-yl)amino)-5-iodophenyl) acrylamide (**5**). <sup>1</sup>H NMR (400

MHz, (CD<sub>3</sub>)<sub>2</sub>SO): δ 5.79 (1H, dd, *J* = 10.0, 2.0 Hz), 6.27 (1H, dd, *J* = 16.8, 2.0 Hz), 6.40 (1H, dd, *J* = 16.4, 10.0 Hz), 7.56 (1H, d, *J* = 2.0 Hz), 7.77 (1H, d, *J* = 2.0 Hz), 7.99 (1H, d, *J* = 2.0 Hz), 8.62 (1H, s), 9.57 (1H, s), 10.31 (1H, s). <sup>13</sup>C NMR (150 MHz, (CD<sub>3</sub>)<sub>2</sub>SO): δ 93.6, 106.1 (q, *J*<sub>CF</sub> = 30.2 Hz), 115.8, 123.0 (q, *J*<sub>CF</sub> = 270 Hz), 125.0, 127.7, 128.9, 131.4, 138.4, 140.4, 156.9 (q, *J*<sub>CF</sub> = 4.4 Hz), 157.5, 162.3, 163.4. HRMS (FAB+) calculated for C<sub>14</sub>H<sub>9</sub>ClF<sub>3</sub>IN<sub>4</sub>O [M+H]<sup>+</sup>: *m/z* = 468.9461, found 468.9559.



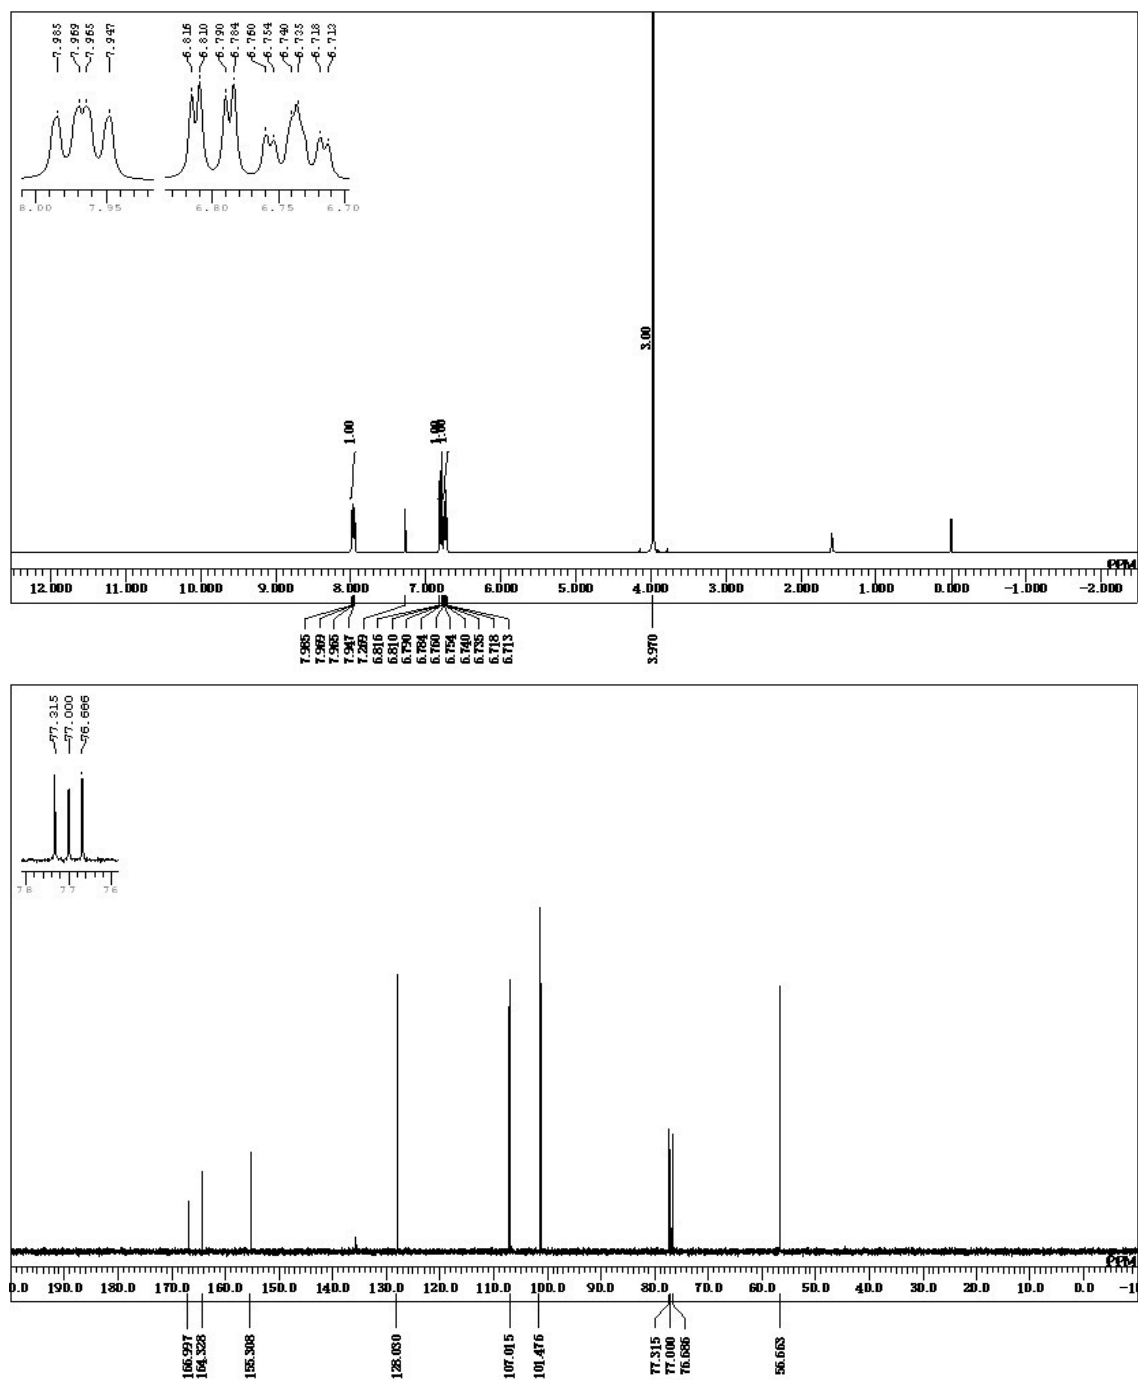

**Figure S6.** The proton and carbon NMR peak of 4-fluoro-2-methoxy-1-nitrobenzene (**6**).  $^1\text{H}$  NMR (400 MHz,  $\text{CDCl}_3$ ):  $\delta$  3.97 (3H, s), 6.74 (1H, dt,  $J = 8.4, 2.0$  Hz), 6.80 (1H, dd,  $J = 10.4, 2.4$  Hz), 7.96 (1H, dd,  $J = 8.4, 6.4$  Hz).  $^{13}\text{C}$  NMR (100 MHz,  $(\text{CD}_3)_2\text{SO}$ ):  $\delta$  56.7, 101.5, 107.0, 128.0, 155.3, 164.3, 167.0. HRMS (DART+) calculated for  $\text{C}_7\text{H}_6\text{FNO}_3$   $[\text{M} + \text{H}]^+$ :  $m/z = 172.0331$ , found 172.0345.

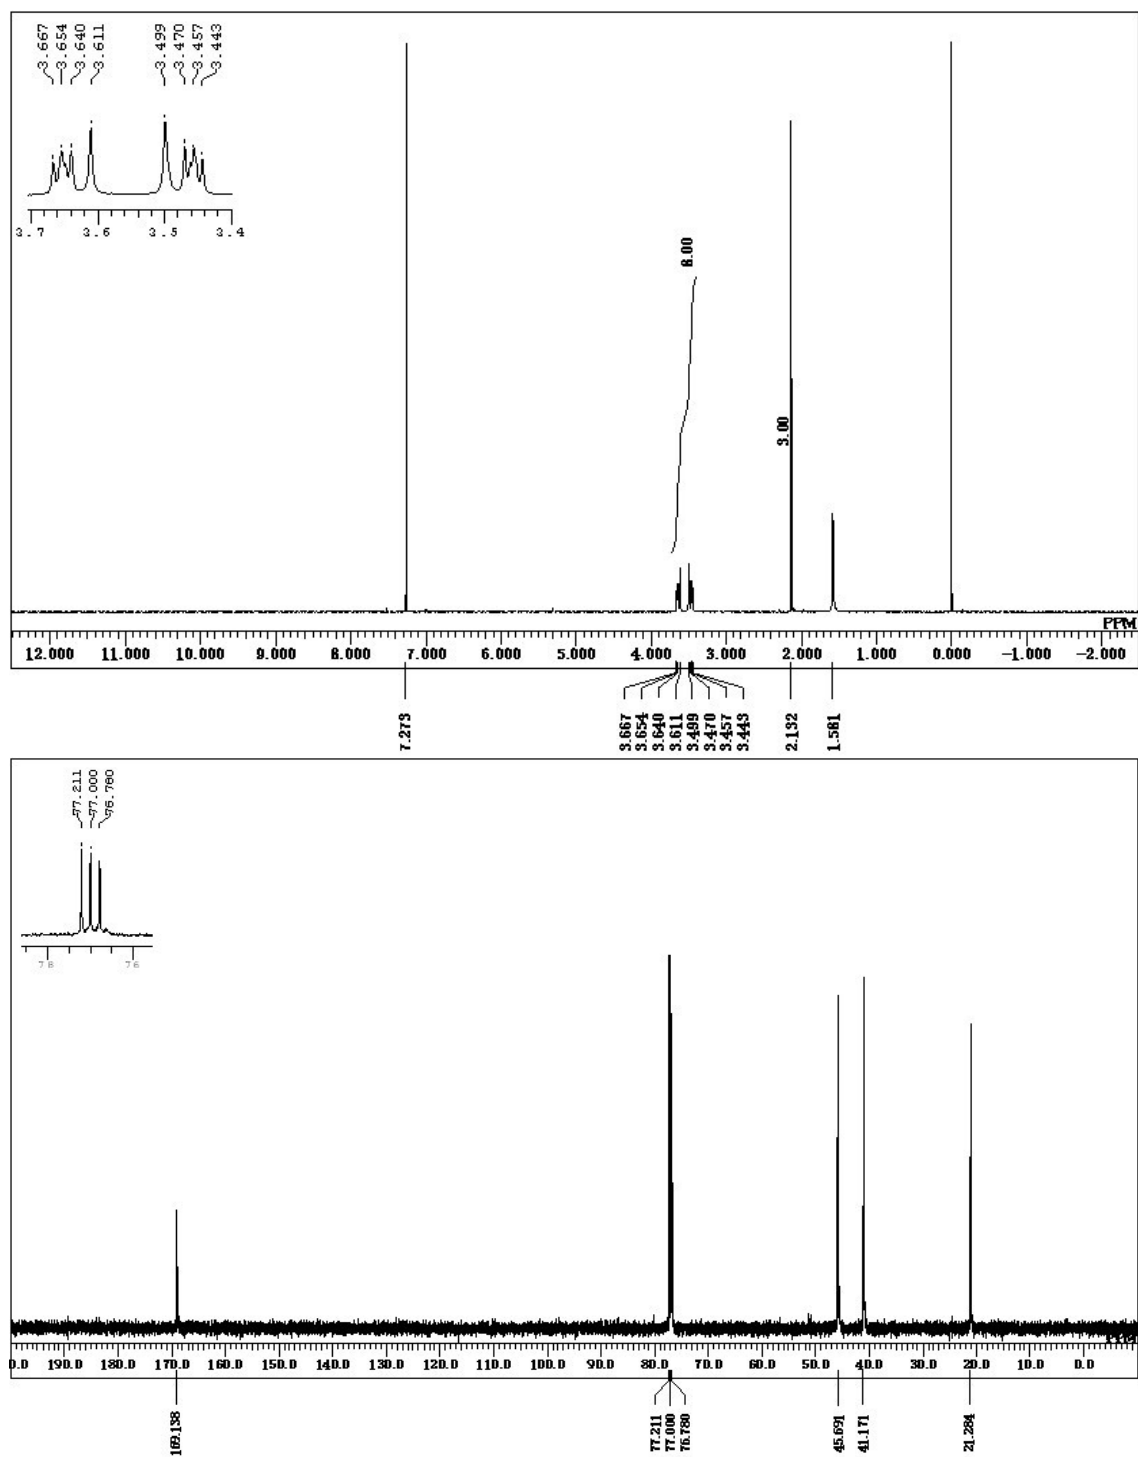

**Figure S7.** The proton and carbon NMR peak of 1-(piperazine-1-yl)ethan-1-one (**7**).  $^1\text{H}$  NMR (400 MHz,  $\text{CDCl}_3$ ):  $\delta$  2.13 (3H, s), 3.40-3.70 (8H, m).  $^{13}\text{C}$  NMR (100 MHz,  $\text{CDCl}_3$ ):  $\delta$  21.3, 41.2 (2C), 45.7 (2C), 169.1. HRMS (FAB+) calculated for  $\text{C}_6\text{H}_{12}\text{N}_2\text{O}$   $[\text{M} + \text{H}]^+$ :  $m/z$  = 129.0949, found 129.1031.

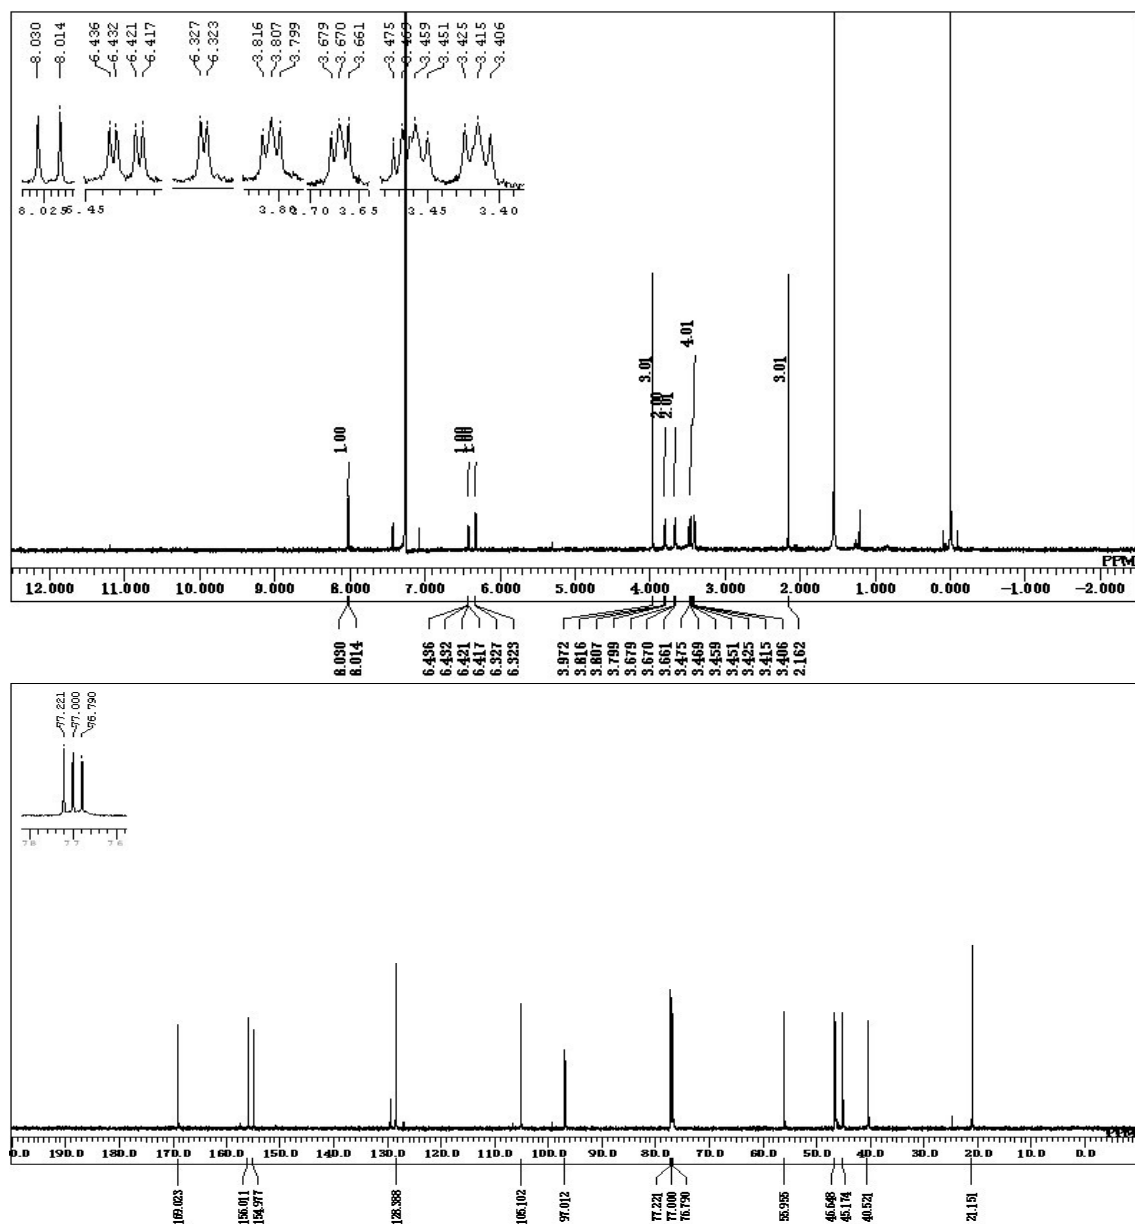

**Figure S8.** The proton and carbon NMR peak of 1-(4-(3-methoxy-4-nitrophenyl)piperazine-1-yl)ethan-1-one (**8**). <sup>1</sup>H NMR (400 MHz, CDCl<sub>3</sub>): δ 2.16 (3H, s), 3.40-3.50 (4H, m), 3.67 (2H, t, *J* = 4.0 Hz), 3.81 (2H, t, *J* = 4.0 Hz), 3.97 (3H, s), 6.33 (1H, d, *J* = 1.6 Hz), 6.42 (1H, dd, *J* = 6.0, 1.6 Hz), 8.02 (1H, d, *J* = 6.4 Hz). <sup>13</sup>C NMR (100 MHz, CDCl<sub>3</sub>): δ, 21.2, 40.5, 45.2, 46.5, 46.6, 56.0, 97.0, 105.1, 128.4, 129.5, 155.0, 156.0, 169.0. HRMS (FAB+) calculated for C<sub>13</sub>H<sub>17</sub>N<sub>3</sub>O<sub>4</sub> [M+ H]<sup>+</sup>: *m/z* = 280.1219, found 280.1295.

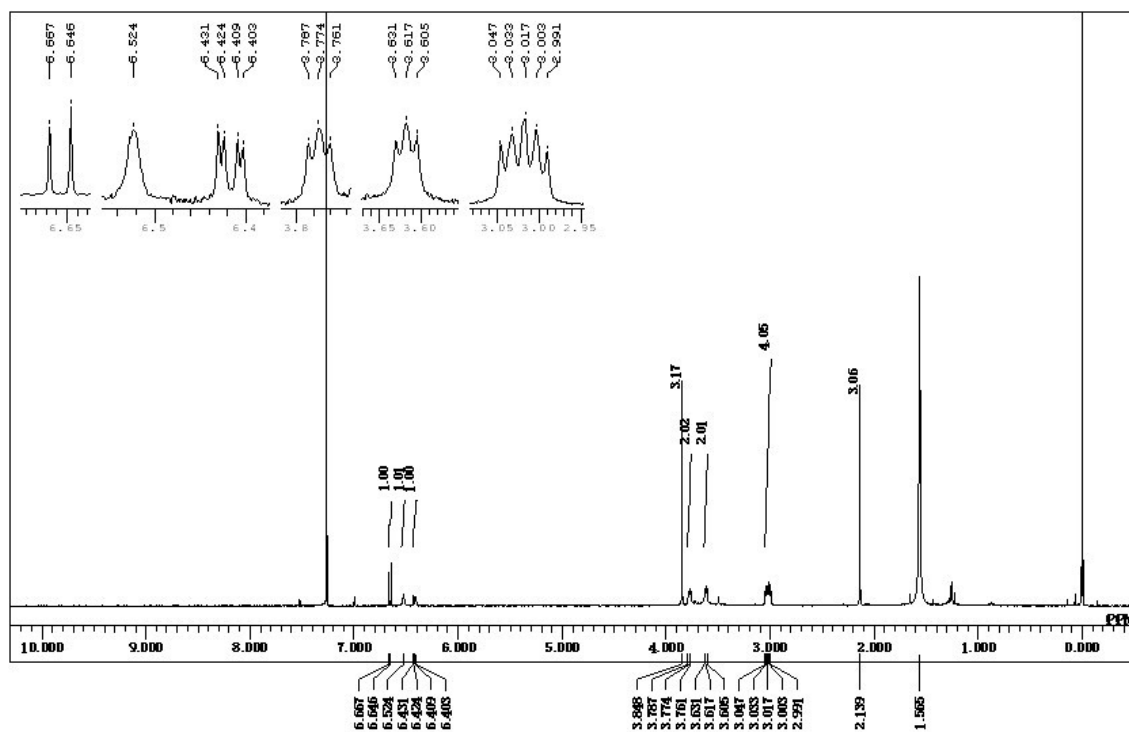

**Figure S9.** The proton NMR peak of 1-(4-(4-amino-3-methoxyphenyl)piperazine-1-yl)ethan-1-one (**9**). <sup>1</sup>H NMR (400 MHz, CDCl<sub>3</sub>): δ 2.13 (3H, s), 2.95-3.08 (4H, m), 3.62 (2H, t, *J* = 5.6 Hz), 3.77 (2H, t, *J* = 5.2 Hz), 3.85 (3H, s), 6.42 (1H, dd, *J* = 8.8, 2.8 Hz), 6.52 (1H, s), 6.66 (1H, d, *J* = 8.4 Hz). HRMS (FAB+) calculated for C<sub>13</sub>H<sub>19</sub>N<sub>3</sub>O<sub>2</sub> [M+ H]<sup>+</sup>: *m/z* = 249.1477, found 249.1464.

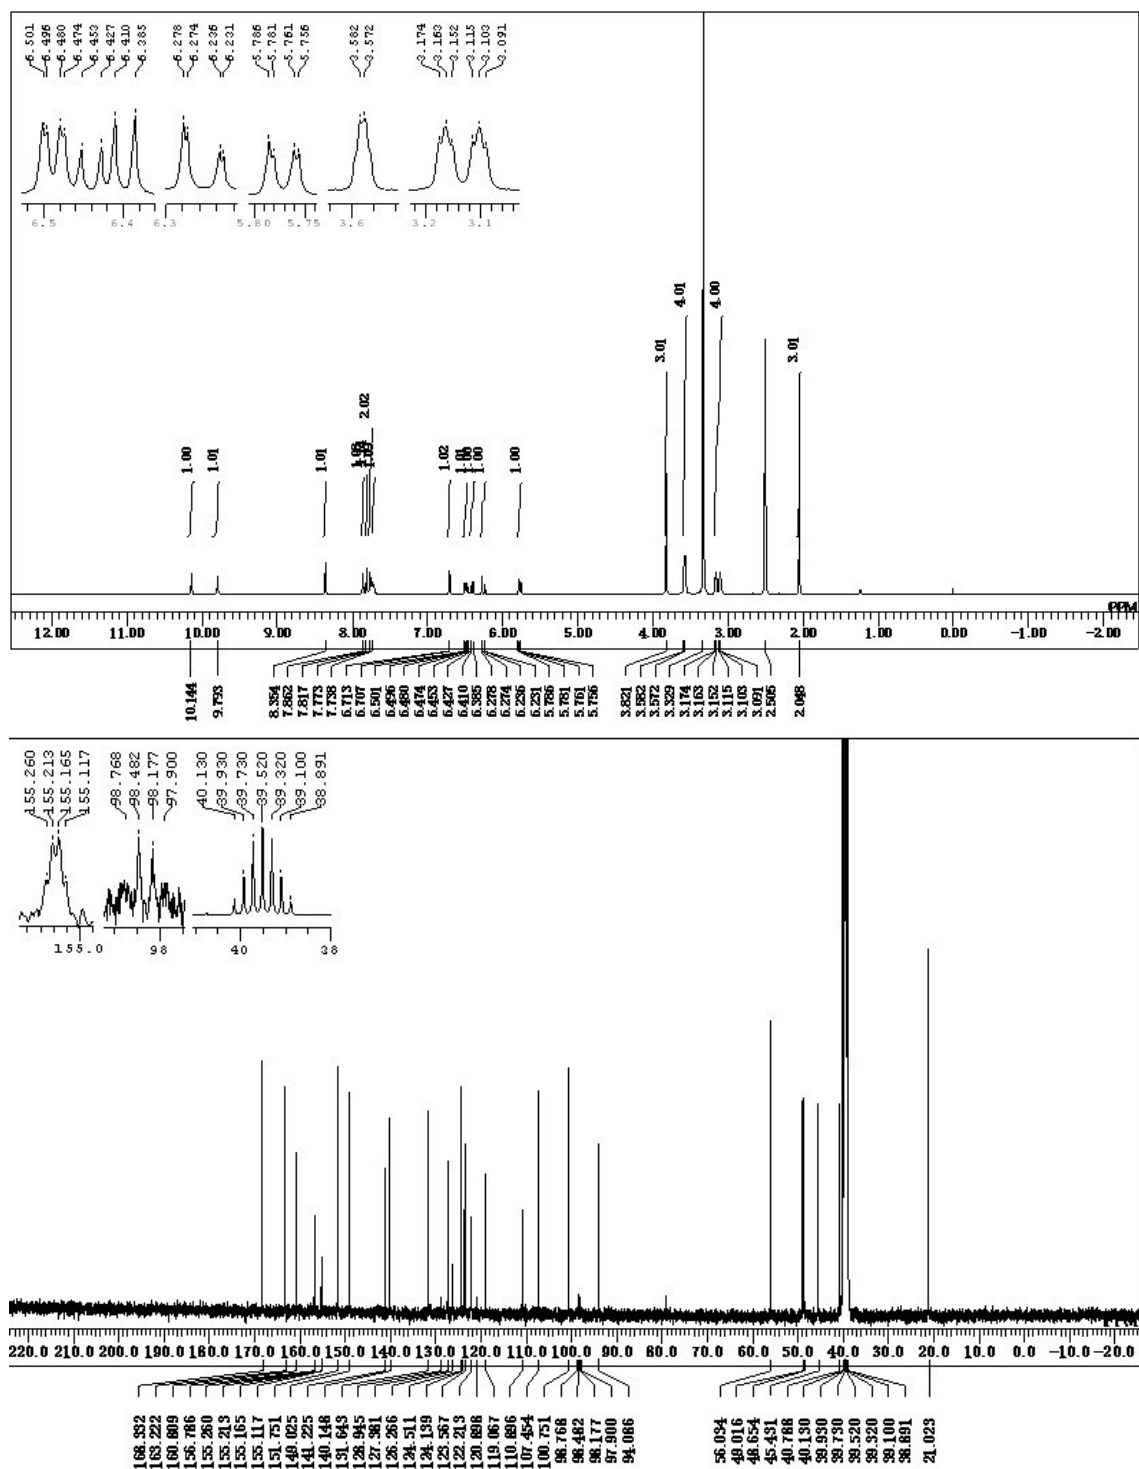

**Figure S10.** The proton and carbon NMR peak of N-(3-((2-((4-(4-acetylpiperazin-1-yl)-2-methoxyphenyl)amino)-5-(trifluoromethyl)pyrimidin-4-yl)amino)-5-iodophenyl)acrylamide (**10**). <sup>1</sup>H NMR (400 MHz, (CD<sub>3</sub>)<sub>2</sub>SO): δ 2.05 (3H, s), 3.10 (2H, t, *J* = 4.8 Hz), 3.16 (2H, t, *J* = 4.4 Hz), 3.53-3.63 (4H, m), 3.82 (3H, s), 5.77 (1H, dd, *J*

= 10.0, 2.0 Hz), 6.25 (1H, dd,  $J = 16.8, 2.0$  Hz), 6.41 (1H, dd,  $J = 16.8, 10.0$  Hz), 6.49 (1H, dd,  $J = 8.8, 2.0$  Hz), 6.71 (1H, s), 7.74 (1H, s), 7.77 (2H, s), 7.82 (1H, s), 7.86 (1H, s), 8.35 (1H, s), 9.79 (1H, s), 10.14 (1H, s).  $^{13}\text{C}$  NMR (100 MHz,  $(\text{CD}_3)_2\text{SO}$ ):  $\delta$  21.0, 40.8, 45.4, 48.7, 49.0, 56.0, 94.1, 98.3 (q,  $J_{\text{CF}} = 30.5$  Hz), 100.8, 107.5, 110.9, 119.1, 122.2, 124.1, 124.5, 124.8 (q,  $J_{\text{CF}} = 270$  Hz), 127.4, 131.6, 140.1, 141.2, 149.0, 151.8, 155.2 (q,  $J_{\text{CF}} = 4.8$  Hz), 156.8, 160.8, 163.2, 168.3. HRMS (FAB+) calculated for  $\text{C}_{27}\text{H}_{27}\text{F}_3\text{IN}_7\text{O}_3$   $[\text{M} + \text{H}]^+$ :  $m/z = 681.1172$ , found 681.1186.

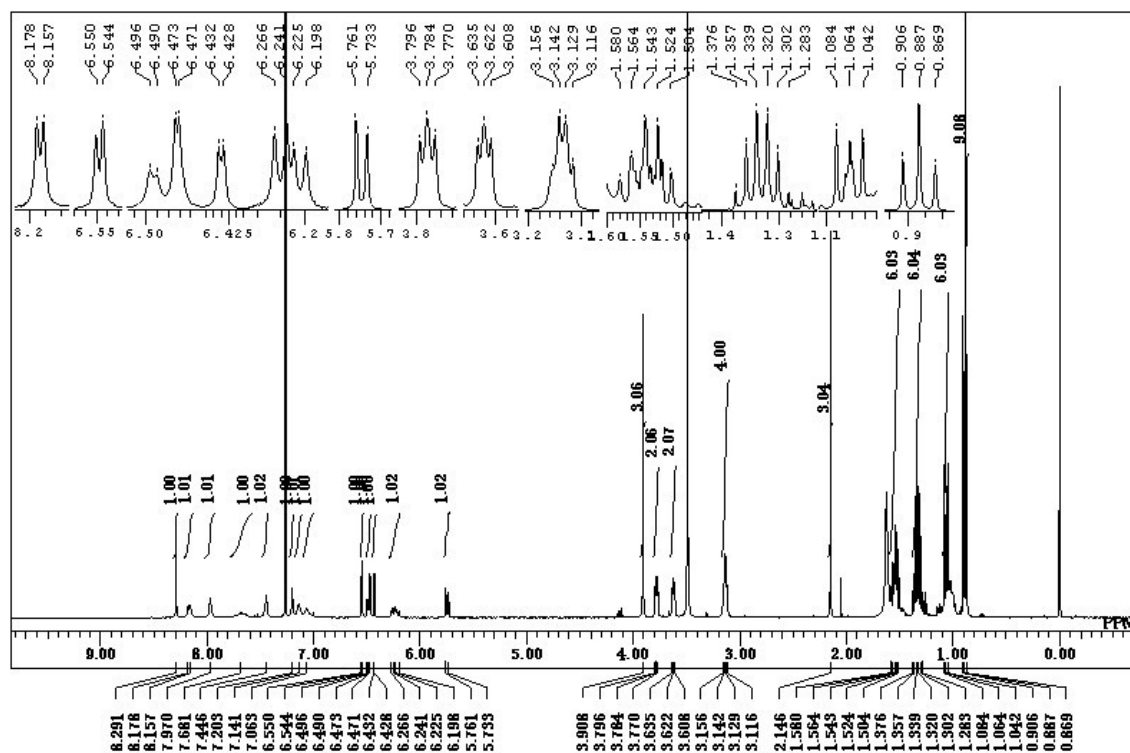

**Figure S11.** The proton NMR peak of N-(3-((2-((4-(4-acetylpiperazin-1-yl)-2-methoxyphenyl)amino)-5-(trifluoromethyl)pyrimidin-4-yl)amino)-5-(tributylstannyl)phenyl)acrylamide (**11**).  $^1\text{H}$  NMR (400 MHz,  $\text{CDCl}_3$ ):  $\delta$  0.88 (9H, t,  $J = 7.6$  Hz), 1.06 (6H, t,  $J = 8.0$  Hz), 1.33 (6H, sex,  $J = 7.6$  Hz), 1.54 (6H, quin,  $J = 7.6$  Hz), 2.14 (3H, s), 3.10-3.20 (4H, m), 3.62 (2H, t,  $J = 5.6$  Hz), 3.78 (2H, t,  $J = 5.6$  Hz), 3.91 (3H, s), 5.75 (1H, d,  $J = 11.2$  Hz), 6.23 (1H, dd,  $J = 17.2, 10.8$  Hz), 6.43 (1H, d,  $J = 1.6$  Hz), 6.48 (1H, dd,  $J = 7.6, 2.0$  Hz), 6.54 (1H, d,  $J = 2.4$  Hz), 7.68 (1H, s), 7.06 (1H, s), 7.14 (1H, s), 7.20 (1H, s), 7.44 (1H, s), 7.97 (1H, s), 8.16 (1H, d,  $J = 8.4$  Hz), 8.29 (1H, s). HRMS (FAB+) calculated for  $\text{C}_{39}\text{H}_{54}\text{F}_3\text{N}_7\text{O}_3\text{Sn}$  [ $\text{M} + \text{H}$ ] $^+$ :  $m/z = 845.3267$  found 845.3262.

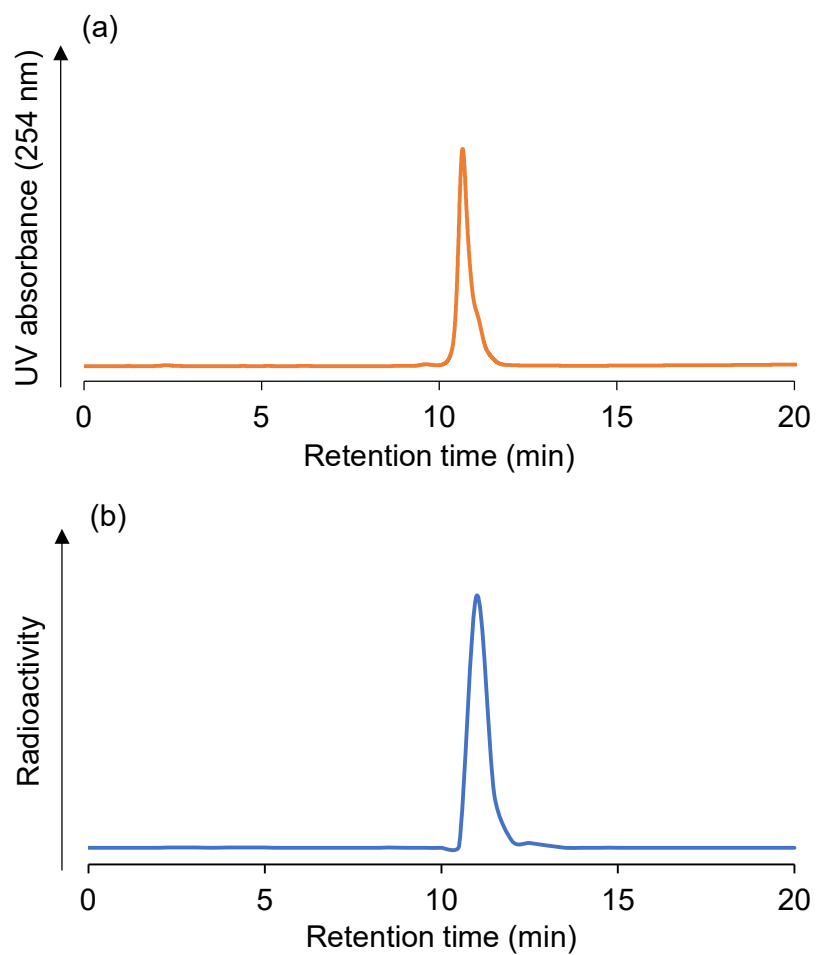

**Figure S12.** The chromatograms of (a) nonradioactive iodinated compound **10** (ICO1686) and (b) radioactive compound [ $^{125}\text{I}$ ]**10** ([ $^{125}\text{I}$ ]**10**).



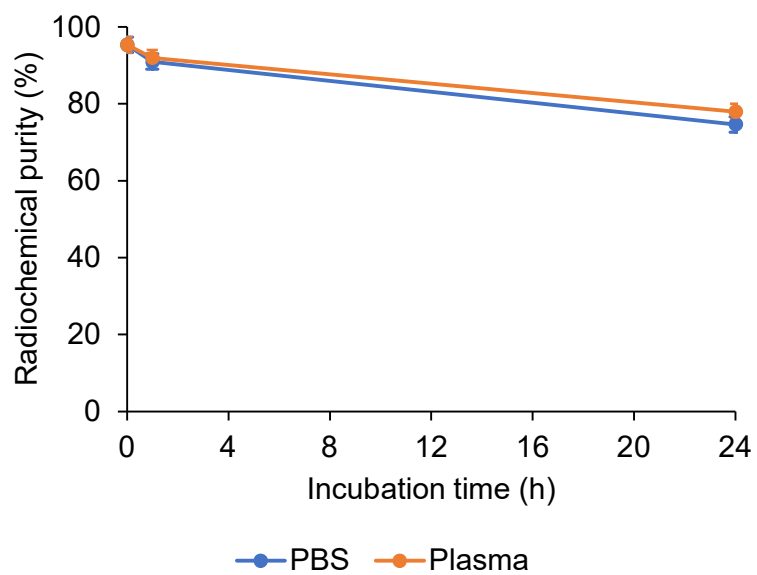

**Figure S13.** The stability of radiolabeled compound [125I]10 in PBS and plasma.
